# Supplementary material
Source: PubMed Central journal article supplement (PMC7132202)

# WB raw data with size marker indications – Figure 1

## Figure1A

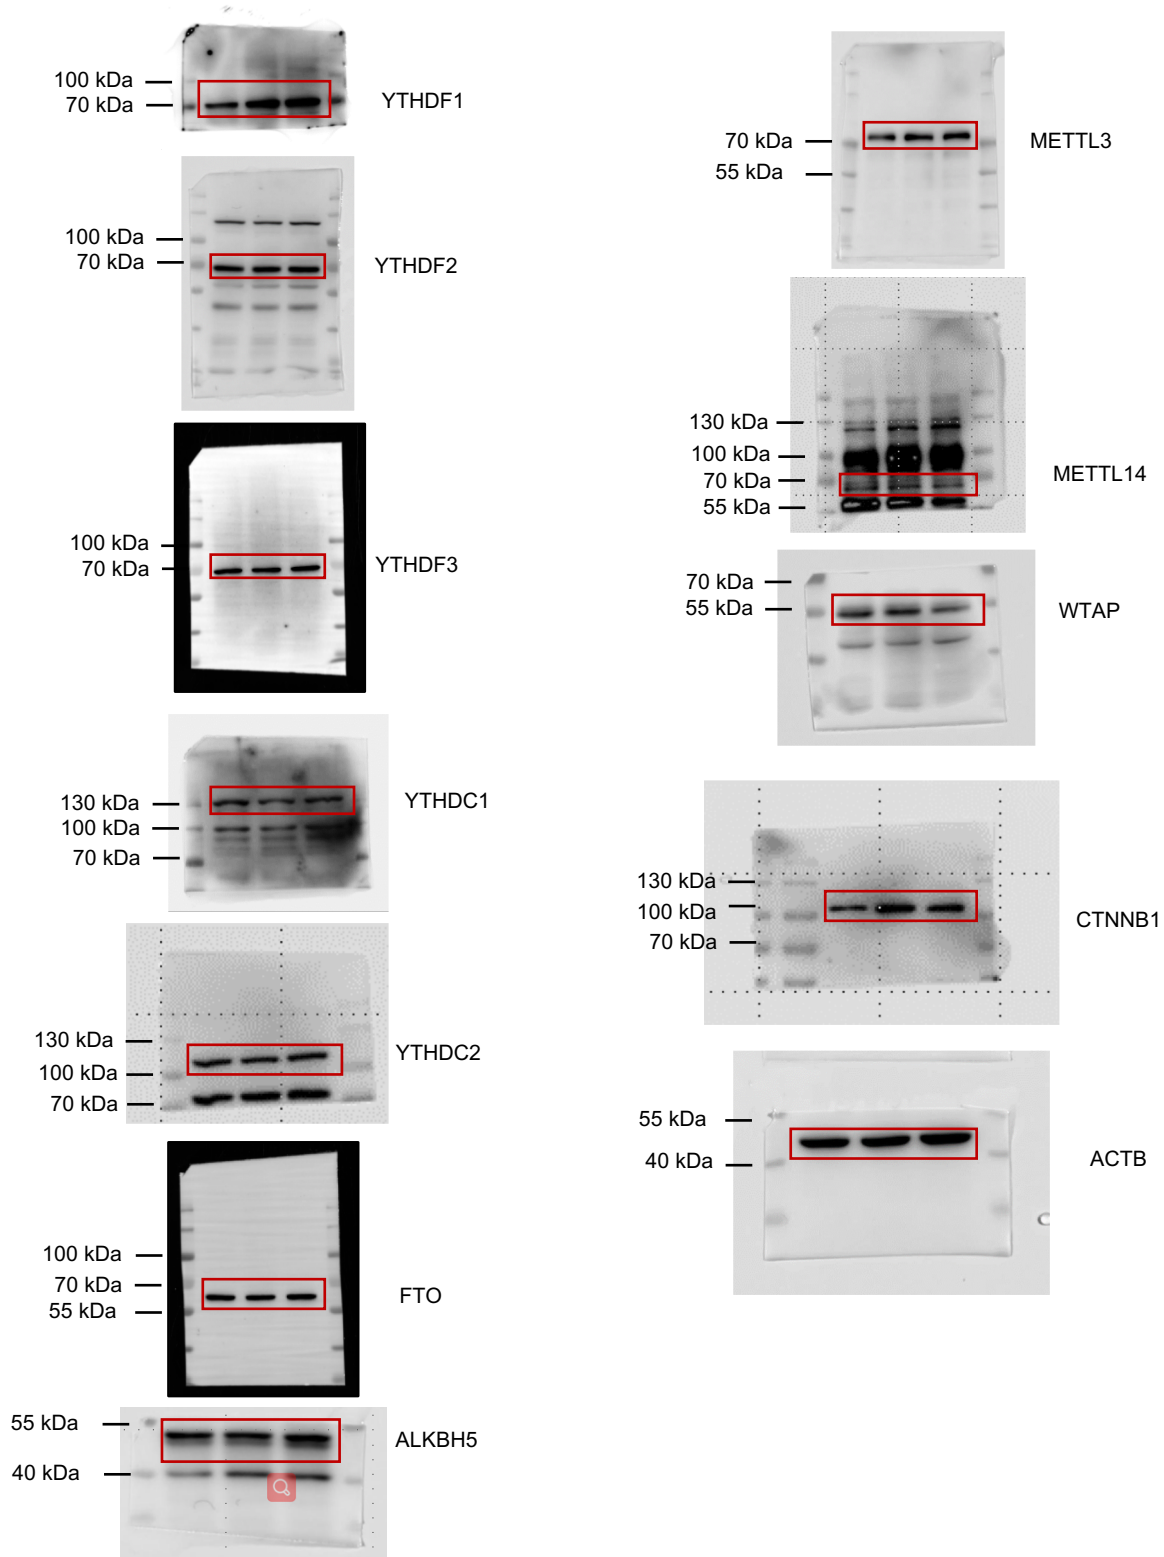

**Figure1C**

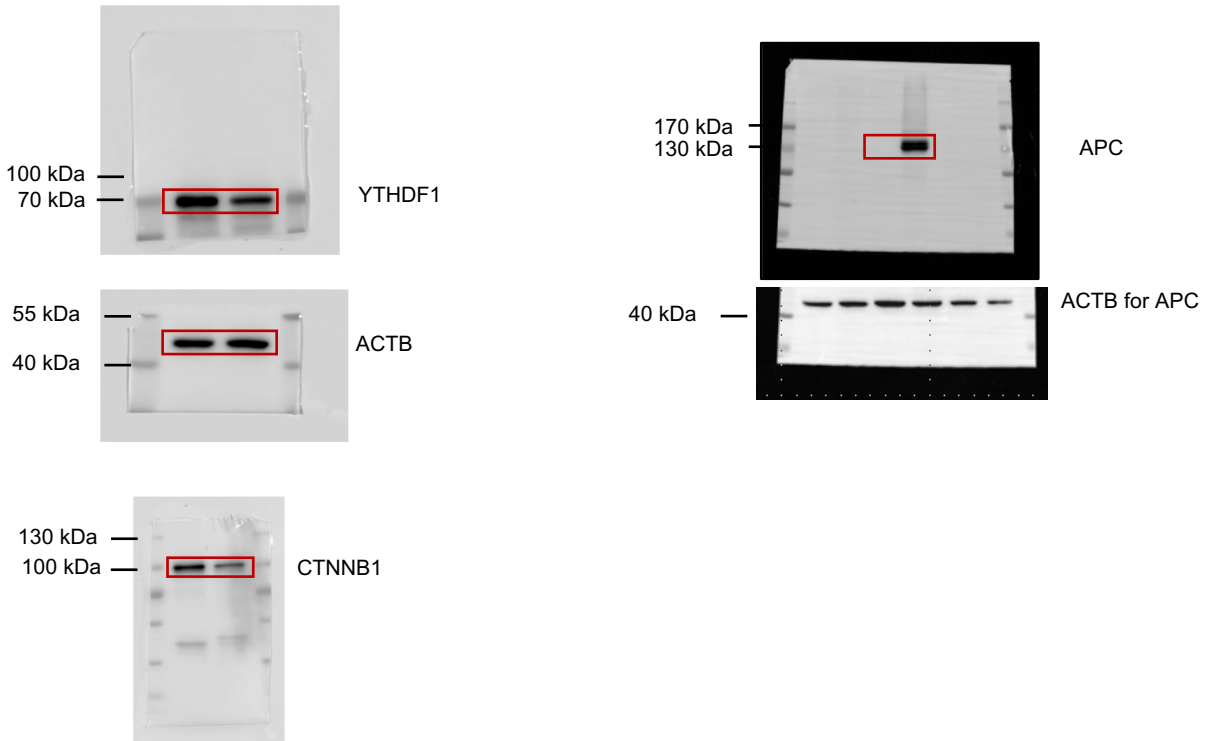

**Figure1F**

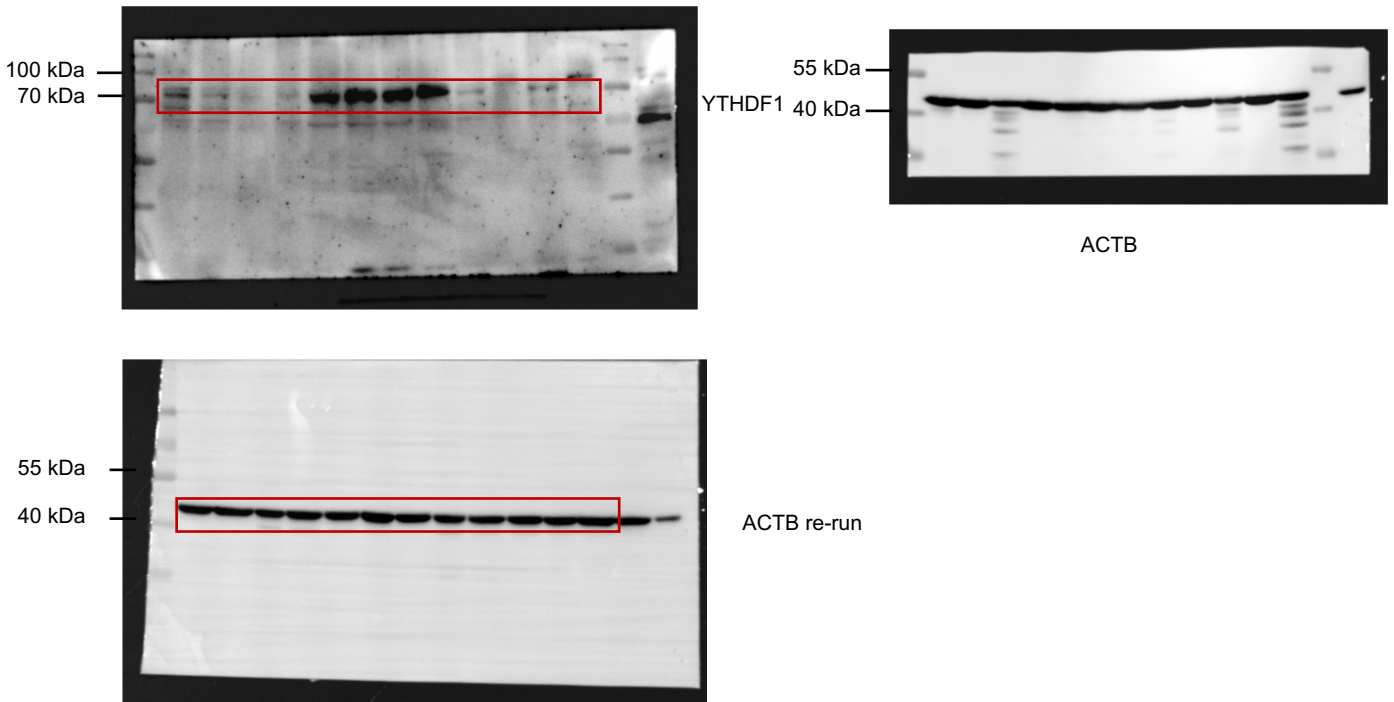

Supplement: EMBR-21-e49229-s008.pdf [file EMBR-21-e49229-s008.pdf]

# WB raw data with size marker indications – Figure 2

Figure 2B

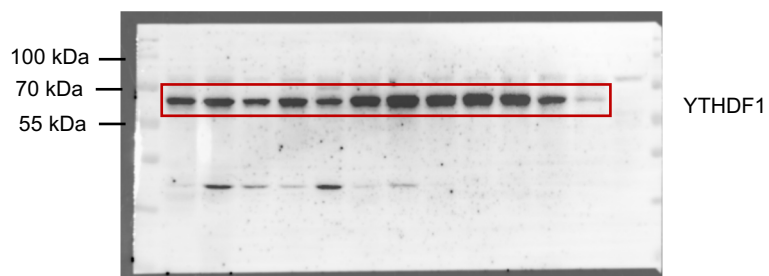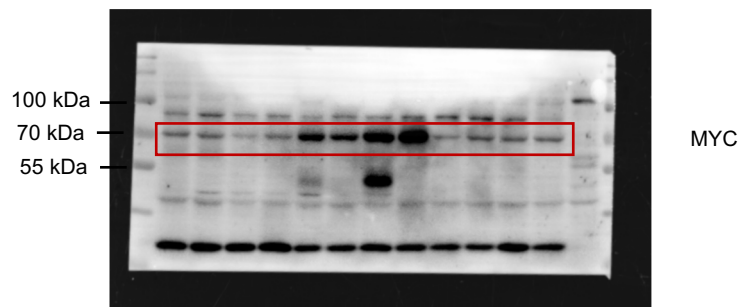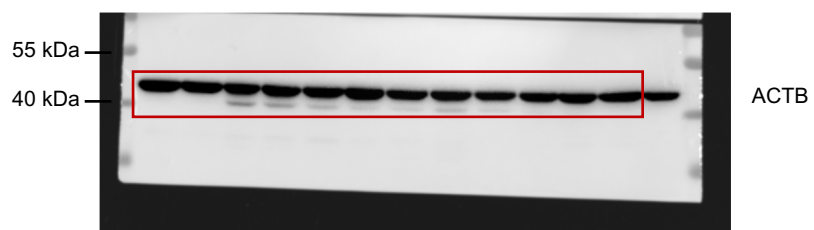

Supplement: EMBR-21-e49229-s009.pdf [file EMBR-21-e49229-s009.pdf]

# WB raw data with size marker indications – Figure 4

Figure 4B

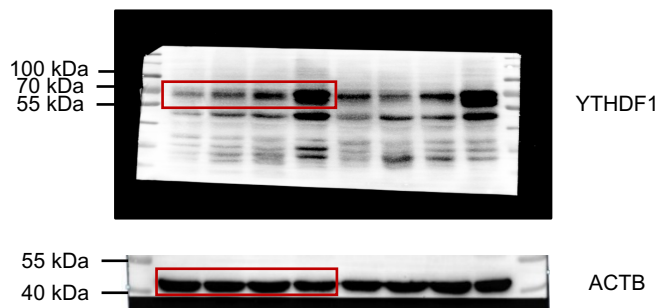

Supplement: EMBR-21-e49229-s010.pdf [file EMBR-21-e49229-s010.pdf]

# WB raw data with size marker indications – Figure 6

## Figure 6A

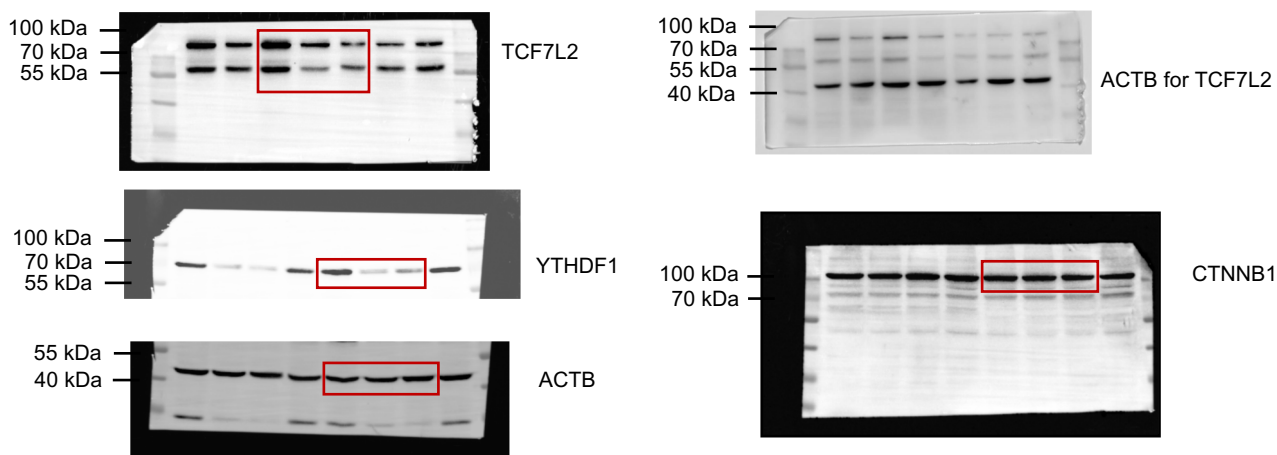

## Figure 6C

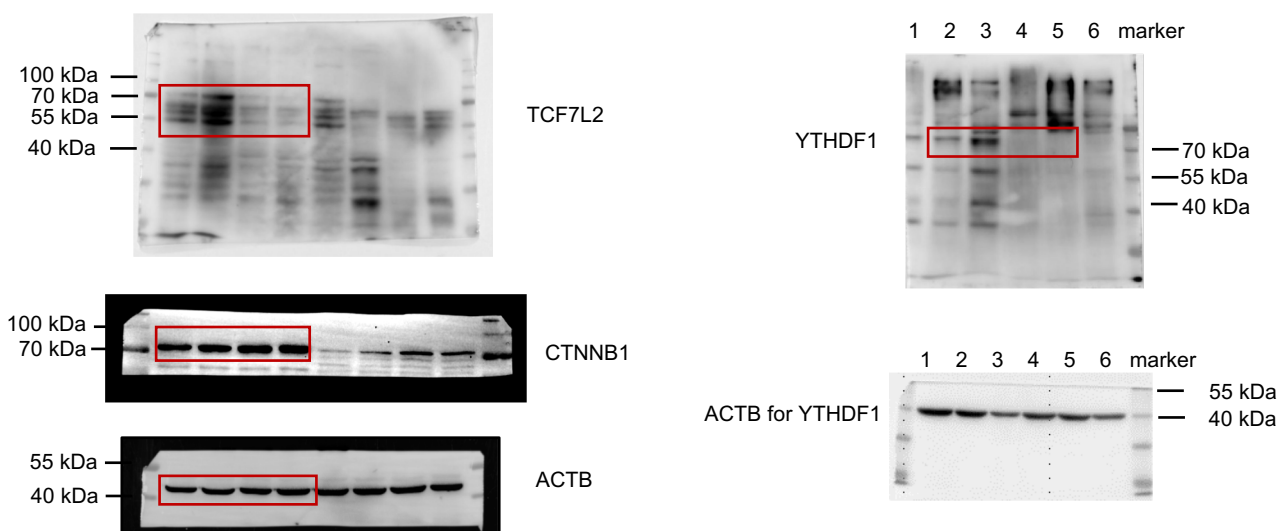

## Figure 6D

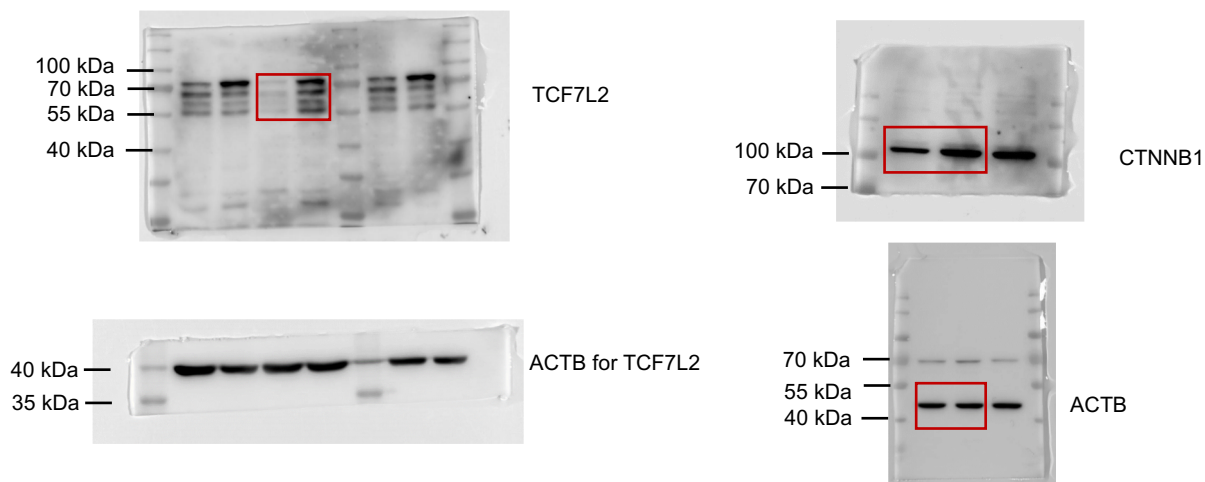

Supplement: EMBR-21-e49229-s011.pdf [file EMBR-21-e49229-s011.pdf]

# WB raw data with size marker indications – Figure 7

## Figure 7A

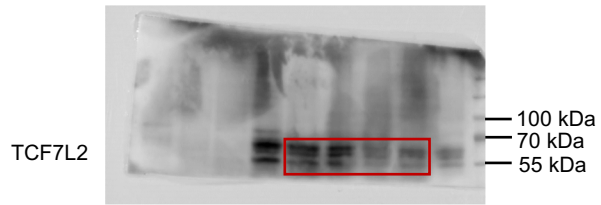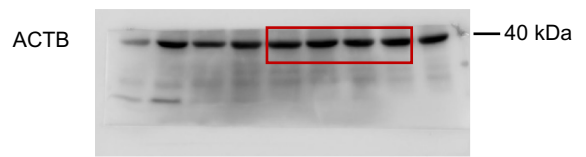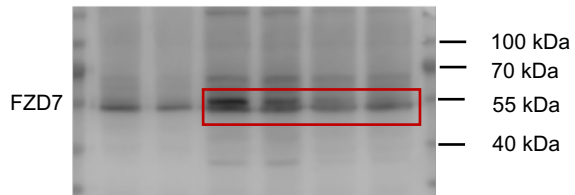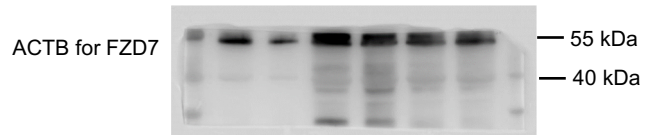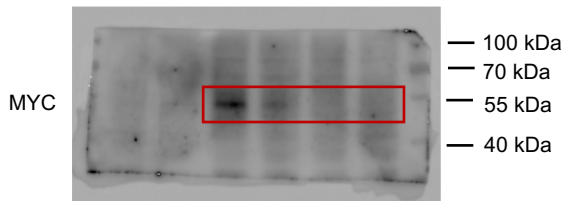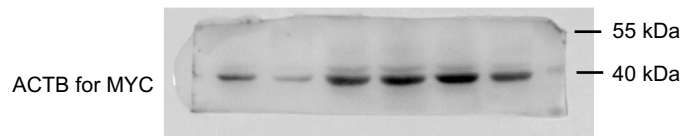

Supplement: EMBR-21-e49229-s012.pdf [file EMBR-21-e49229-s012.pdf]
